# Supplementary material for: Lanspora dorisauae, a new marine fungus from rocky shores in Taiwan
Source: PeerJ. 2023 Aug 28;11:e15958. doi: 10.7717/peerj.15958 (PMC10470443; doi:10.7717/peerj.15958)
Supplement: Supplemental Information 1 [file peerj-11-15958-s001.xlsx]

## Sheet: Sheet2
No	Statistics	Ascomata
		Ostiole	Peridium	Neck Ascomata		Ascomata		Ascus
1				width	Length	Width	Length	width	Length
2		30.53	24.03	44.27	104.31	347.12	213.03	16.1	42.22
3		43.65	19.63	48.7	108.59	256.98	166.97	16.11	42.36
4		37.9	20.64	55.48	104.45	261.77	167.7	16.19	51.36
5		32.57	13.49	45.45	80.04	240.23	148.08	15.68	40.57
6	Mean	36.16	19.45	48.48	99.35	276.52	173.94	16.02	44.13
7	SD	5.88	4.4	5.03	13.03	47.96	27.59	0.23	4.89
8	Min	30.53	13.49	44.27	80.04	240.23	148.08	15.68	40.57
9	Max	43.65	24.03	55.48	108.59	347.12	213.03	16.19	51.36
